# Supplementary material
Source: PubMed Central journal article supplement (PMC1637561)

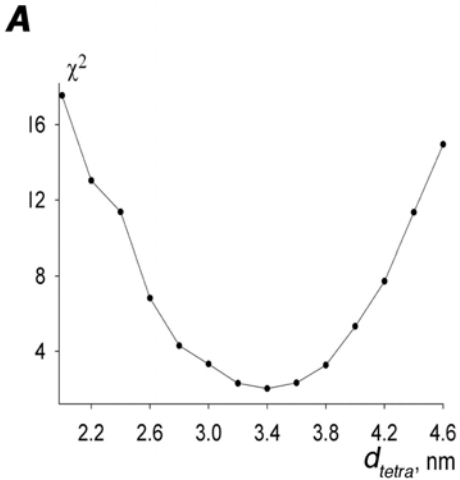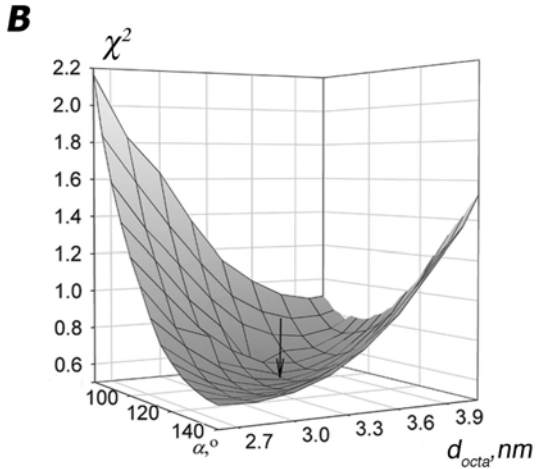

Supplement: pnas_0603629103_2.pdf [file pnas_0603629103_2.pdf]
